# Supplementary material for: Trans-Endothelial Migration of Memory T Cells Is Impaired in Alemtuzumab-Treated Multiple Sclerosis Patients
Source: MDPI journal article supplement (doi:10.3390/jcm11216266), 2022-10-24
Supplement: s1 [file s1]

## Supplementary Materials

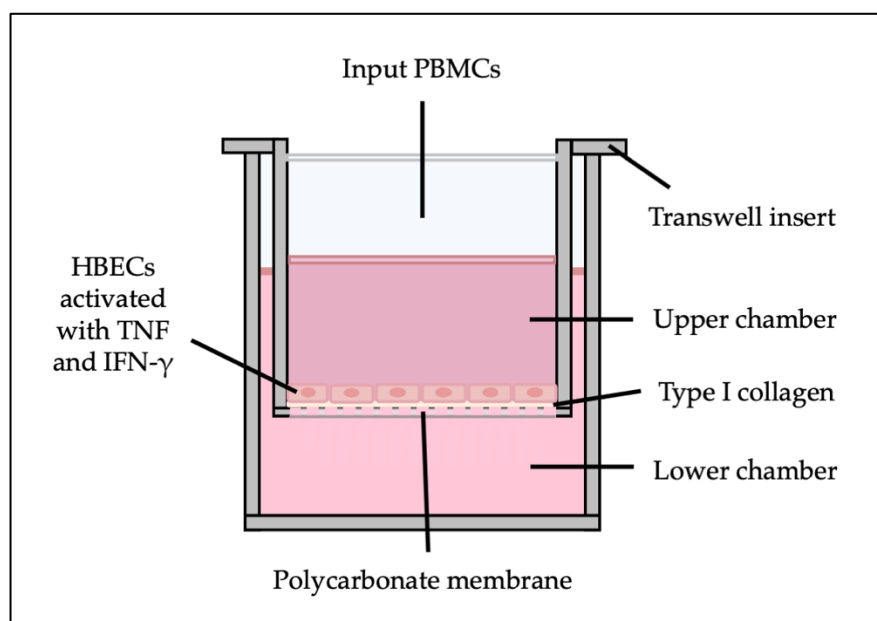

**Figure S1. Experimental set-up of in vitro BBB model using a transmigration assay.** The two-compartment system was separated by a porous membrane to replicate the peripheral blood circulation (upper chamber) and the CNS parenchyma (lower chamber). The polycarbonate membrane had 3  $\mu\text{m}$  pores that were coated in collagen to mimic the basement membrane within the BBB. Collagen allowed HBECs, derived from the hCMEC/D3 cell line, to grow as a continuous monolayer. 5 ng/mL TNF and 10 ng/mL IFN- $\gamma$  stimulated the endothelial cell layer to mimic an inflamed BBB. After cytokines were washed away, PBMCs that were isolated from healthy controls, untreated RRMS patients or alemtuzumab-treated RRMS patients were then added to the upper chamber and left overnight to migrate. HBEC, human brain endothelial cells; IFN- $\gamma$ , interferon-gamma; PBMC, peripheral blood mononuclear cells; TNF, tumour necrosis factor.

**Table S1.** The inclusion and exclusion criteria of the study participants.

| Type of Study Participant | Inclusion Criteria                                                                                                                                                                                                                                                                                                                                                                                                                                                                           | Exclusion Criteria                                                                                               |
|---------------------------|----------------------------------------------------------------------------------------------------------------------------------------------------------------------------------------------------------------------------------------------------------------------------------------------------------------------------------------------------------------------------------------------------------------------------------------------------------------------------------------------|------------------------------------------------------------------------------------------------------------------|
| Healthy controls          | <ul style="list-style-type: none"> <li>MS patients refer a friend or relative of a similar age</li> <li>People from the general population can make a voluntary contribution</li> </ul>                                                                                                                                                                                                                                                                                                      | <ul style="list-style-type: none"> <li>Methylprednisolone within the last 6 months</li> <li>Pregnancy</li> </ul> |
| Untreated RRMS patients   | <ul style="list-style-type: none"> <li>Either recruited from the MS Clinic at Sydney Neurology at the Brain and Mind Centre (BMC), Sydney, and from Central West Neurology and Neurosurgery in Orange, Central Western NSW</li> <li>At least yearly MRI on high resolution 3T magnets</li> <li>Have serial volumetric assessments performed at the Sydney Neuroimaging Analysis Centre (SNAC)</li> <li>Early non-treated patients with longstanding (&gt;10 years) or benign RRMS</li> </ul> | <ul style="list-style-type: none"> <li>Methylprednisolone within the last 6 months</li> <li>Pregnancy</li> </ul> |

|                              |                                                                                                                                                                                                                                                                                                                       |                                                                                                                      |
|------------------------------|-----------------------------------------------------------------------------------------------------------------------------------------------------------------------------------------------------------------------------------------------------------------------------------------------------------------------|----------------------------------------------------------------------------------------------------------------------|
| Alemtuzumab-treated patients | <ul style="list-style-type: none"> <li>• Either recruited from the MS Clinic at Sydney Neurology at the Brain and Mind Centre (BMC), Sydney, and from Central West Neurology and Neurosurgery in Orange, Central Western NSW</li> </ul>                                                                               |                                                                                                                      |
|                              | <ul style="list-style-type: none"> <li>• At least yearly MRI on high resolution 3T magnets</li> <li>• Have serial volumetric assessments performed at the Sydney Neuroimaging Analysis Centre (SNAC)</li> <li>• Received first dose of alemtuzumab treatment with additional follow-ups at 6 and 12 months</li> </ul> | <ul style="list-style-type: none"> <li>• Methylprednisolone within the last 6 months</li> <li>• Pregnancy</li> </ul> |

**Table S2.** List of fluorochrome-conjugated antibodies and clones for flow cytometric analysis.

| Cell Marker | Fluorochrome     | Clone   | Company                                                |
|-------------|------------------|---------|--------------------------------------------------------|
| CD3         | Alexa Fluor 532  | UCHT1   | eBioscience, ThermoFisher Scientific, Waltham, MA, USA |
| CD4         | Alexa Fluor 700  | RPA-T4  | BioLegend, San Diego, CA, USA                          |
| CD8         | BV480            | RPA-T8  | BD Biosciences, Franklin Lakes, NJ, USA                |
| CD14        | Pacific Blue     | M5E2    | BioLegend                                              |
| CD16        | FITC             | 3G8     | Beckman Coulter, Lane Cove West, N.S.W., Australia     |
| CD19        | BV570            | HIB19   | BioLegend                                              |
| CD20        | Super Bright 436 | 2H7     | eBioscience, ThermoFisher Scientific                   |
| CD24        | PerCP            | ML5     | BioLegend                                              |
| CD27        | BV650            | O323    | BioLegend                                              |
| CD28        | BV510            | CD28.2  | BioLegend                                              |
| CD38        | BV785            | HIT2    | BioLegend                                              |
| CD45RA      | PerCP-Cy5        | HI100   | BioLegend                                              |
| CD49d       | PE-Cy5.5         | 9F10    | BioLegend                                              |
| CD56        | BV750            | 5.1H11  | BioLegend                                              |
| CD62L       | BV711            | DREG-56 | BioLegend                                              |
| CD69        | BV421            | FN50    | BioLegend                                              |
| CD161       | PE-Dazzle 594    | HP-3G10 | BioLegend                                              |
| CD196       | BV605            | GO34E3  | BioLegend                                              |
| CD197       | PE               | G043H7  | Beckman Coulter                                        |
| CD274       | PECy7            | 29E.2A3 | BioLegend                                              |
| GPR56       | APC              | 4C3     | BioLegend                                              |

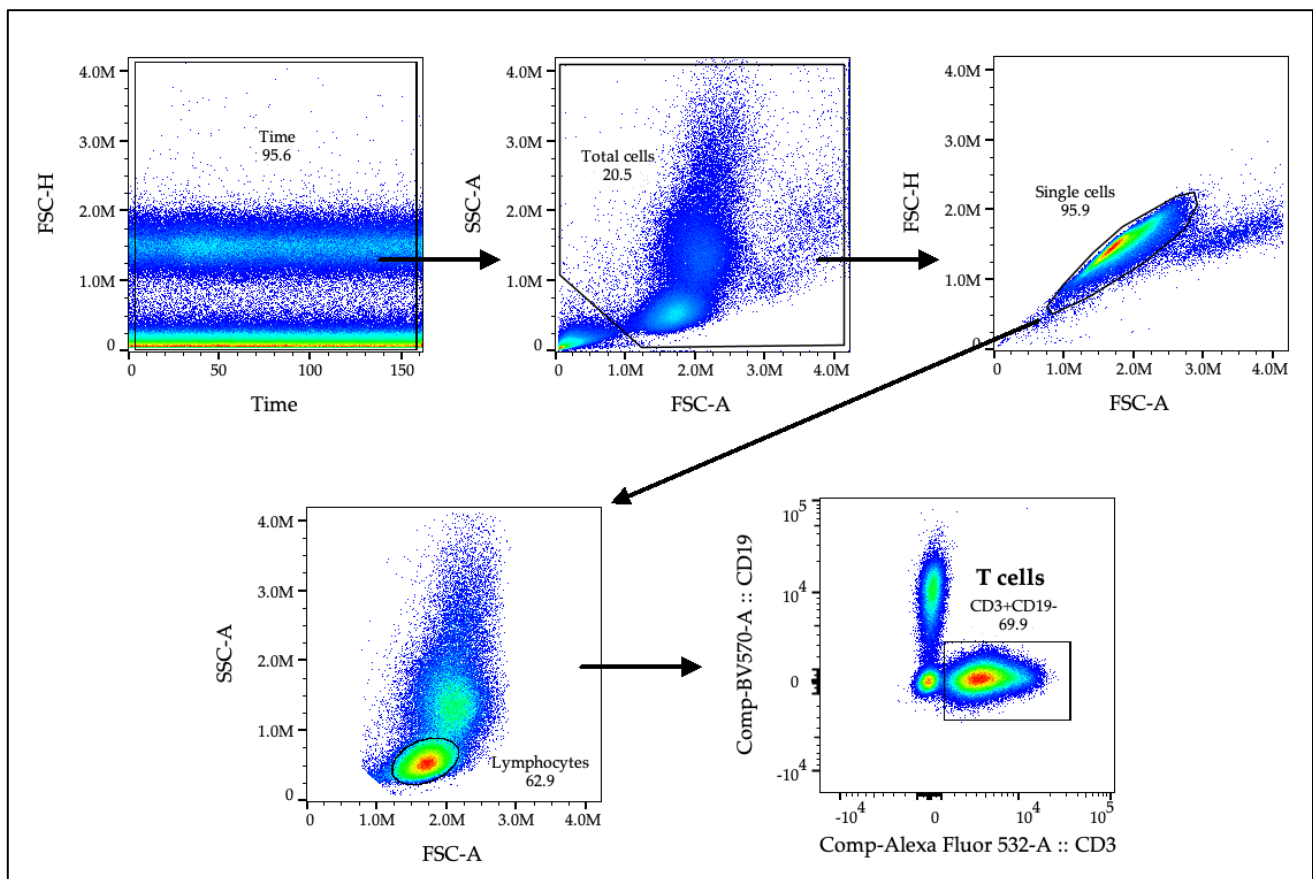

**Figure S2. Preliminary gating strategy.** Samples were first gated based on their forward-scatter-height (FSC-H) and time to obtain a consistent representative sample. Total PBMCs were gated based on their forward-scatter-area (FSC-A) and side-scatter-area (SSC-A). Single cells were identified by the exclusion of doublets and triplets using FSC-A and FSC-H. Lymphocytes were gated on using FSC-A and SSC-A. Major lymphocyte populations were identified and CD3<sup>+</sup> T cells were categorised based on CD4<sup>+</sup> and CD8<sup>+</sup> expression. PBMC, peripheral blood mononuclear cells.

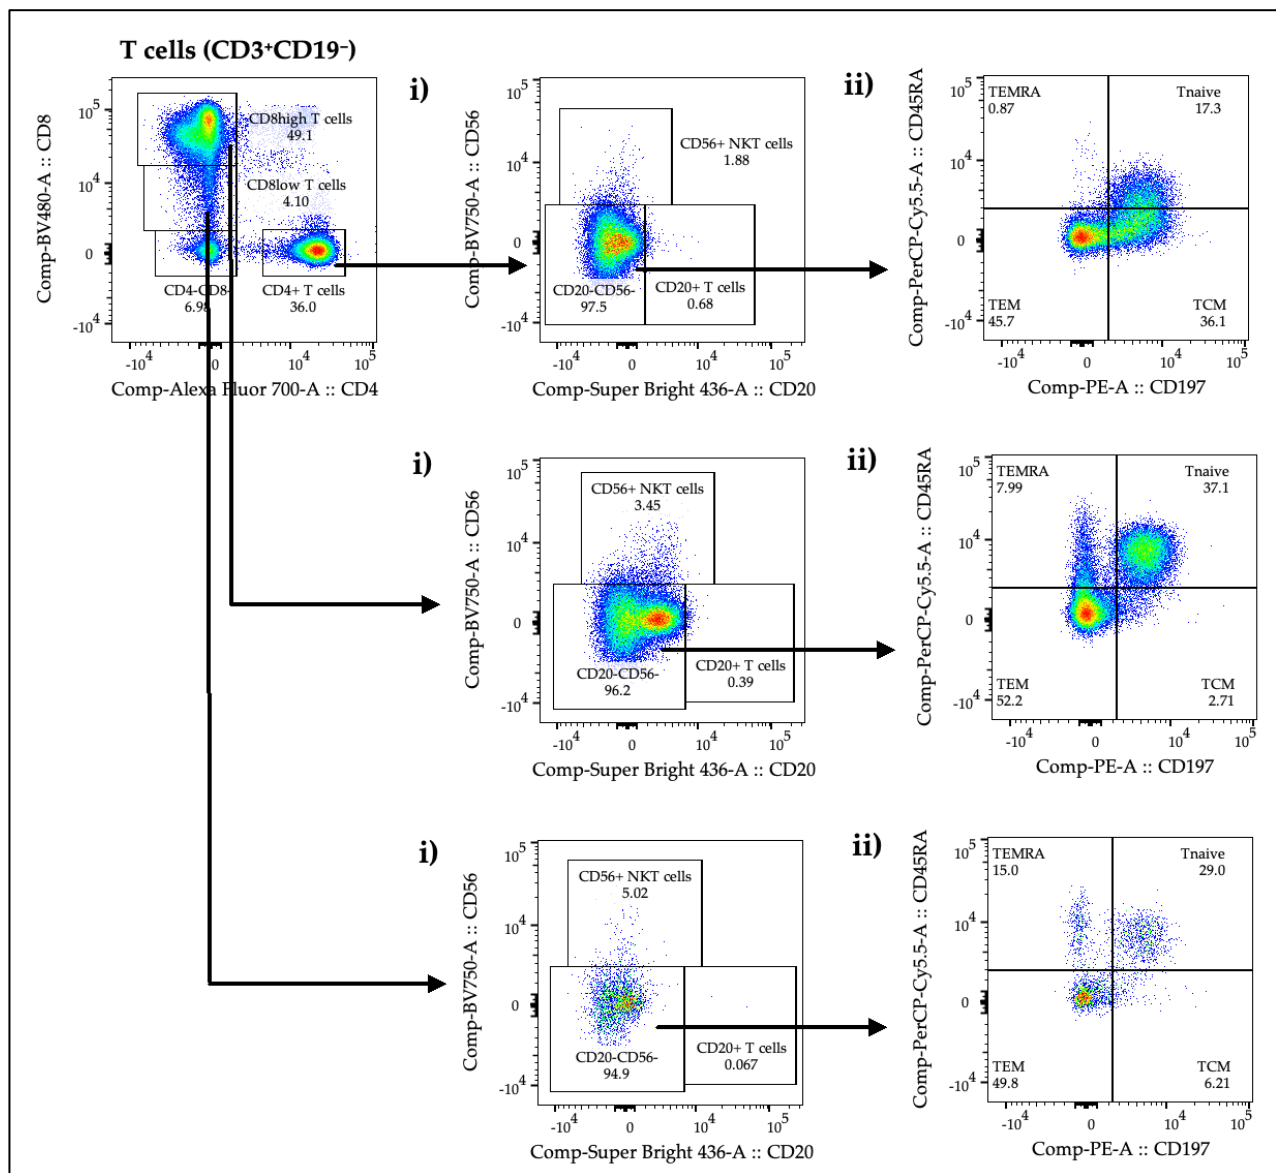

**Figure S3. Gating strategy of T cell subsets.** T cells were identified as CD3<sup>+</sup>CD19<sup>-</sup>; then divided into CD4<sup>+</sup>, CD8<sup>high</sup> and CD8<sup>low</sup> T cell populations. The sequence of gating events is indicated by arrows to identify (i) NKT (CD20<sup>-</sup>CD56<sup>+</sup>), CD20<sup>+</sup> T cells (CD20<sup>+</sup>CD56<sup>-</sup>) and (ii) TEMRA (CD45RA<sup>+</sup>CD197<sup>-</sup>), T<sup>naive</sup> (CD45RA<sup>+</sup>CD197<sup>+</sup>), T<sup>CM</sup> (CD45RA<sup>-</sup>CD197<sup>+</sup>) and T<sup>EM</sup> (CD45RA<sup>-</sup>CD197<sup>-</sup>) cells. NKT, natural killer T cells; T<sup>EM</sup>, effector memory T cells; T<sup>EMRA</sup>, terminally differentiated effector memory cells re-expressing CD45RA T cells; T<sup>naive</sup>, naïve T cells; T<sup>CM</sup>, central memory T cells.

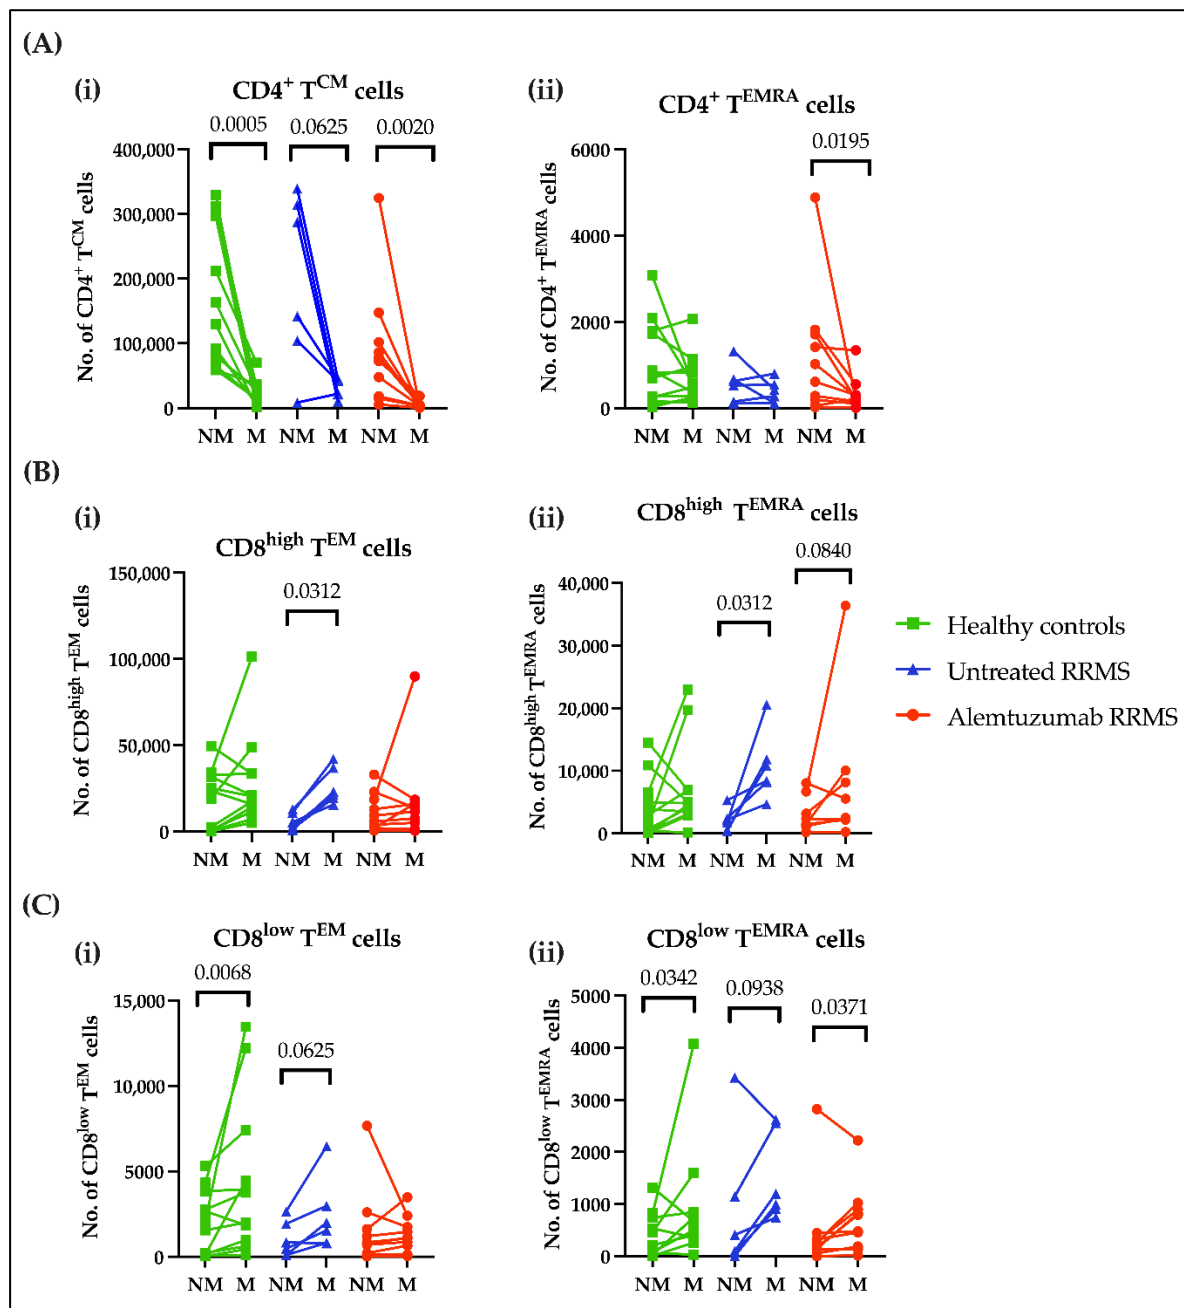

**Figure S4. The trans-endothelial migration of other  $CD4^+$  and  $CD8^+$  T cells subsets.** PBMCs were isolated from healthy controls ( $n = 12$ , green squares), untreated RRMS ( $n = 6$ , blue triangles) and alemtuzumab-treated RRMS patients ( $n = 10$ , red circles). After stimulation of the HBEC monolayer, PBMCs were added to the transwell assay and were left overnight to migrate. **(A)** The number of **(i)**  $CD4^+ T^{CM}$  cells and **(ii)**  $CD4^+ T^{EMRA}$ . **(B)** The number of **(i)**  $CD8^{high} T^{EM}$  and **(ii)**  $CD8^{high} T^{EMRA}$  cells. **(C)** The number of **(i)**  $CD8^{low} T^{EM}$  cells and **(ii)**  $CD8^{low} T^{EMRA}$  cells. Wilcoxon matched-pairs signed-rank test.  $p \leq 0.1$  are shown. NM, non-migrated cells; M, migrated cells; RRMS, relapsing-remitting multiple sclerosis; PBMC, peripheral blood mononuclear cell; HC, healthy control; HBEC, human brain endothelial cell.  $T^{CM}$ , central memory T cells ( $CD45RA-CD197^+$ );  $T^{EM}$ , effector memory T cells ( $CD45RA-CD197^+$ );  $T^{EMRA}$ , terminally differentiated effector memory T cells re-expressing expressing  $CD45RA$  ( $CD45RA^+CD197^+$ );  $T^{naive}$ , naïve T cells ( $CD45RA^+CD197^+$ ).

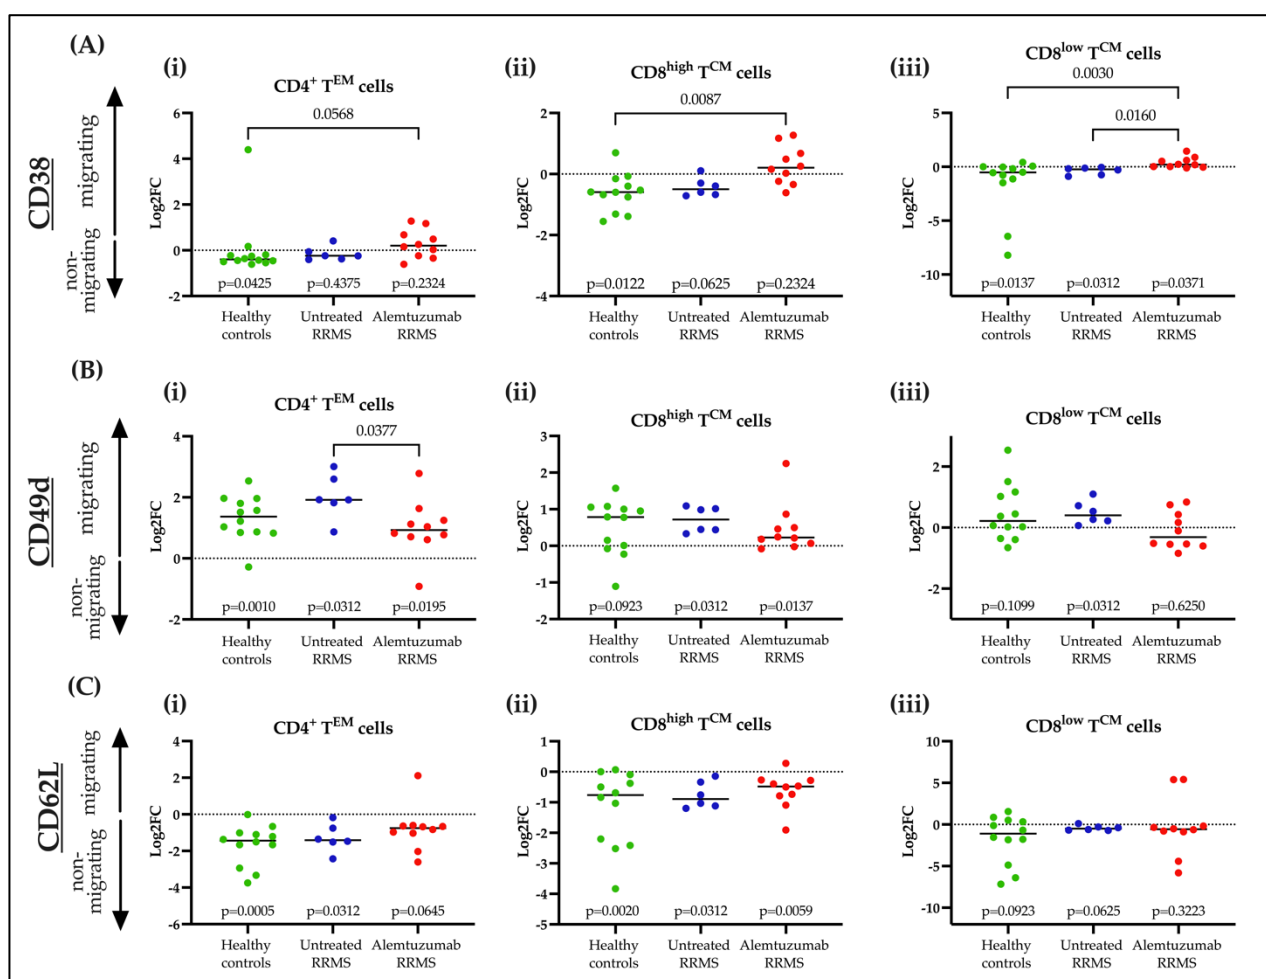

**Figure S5. The logarithm of 2-fold change (Log2FC) ratios of cell surface markers on CD4<sup>+</sup> and CD8<sup>+</sup> memory T cells.** The expression of cell surface markers was calculated in healthy controls (n = 12, green squares), untreated RRMS (n = 6, blue triangles) and alemtuzumab-treated RRMS patients (n = 10, red circles). **(A)** CD38 expression on **(i)** CD4<sup>+</sup> T<sup>EM</sup> cells, **(ii)** CD8<sup>high</sup> T<sup>CM</sup> cells and **(iii)** CD8<sup>low</sup> T<sup>CM</sup> cells. **(B)** CD49d expression on **(i)** CD4<sup>+</sup> T<sup>EM</sup> cells, **(ii)** CD8<sup>high</sup> T<sup>CM</sup> cells and **(iii)** CD8<sup>low</sup> T<sup>CM</sup> cells. **(C)** CD62L expression on **(i)** CD4<sup>+</sup> T<sup>EM</sup> cells, **(ii)** CD8<sup>high</sup> T<sup>CM</sup> cells and **(iii)** CD8<sup>low</sup> T<sup>CM</sup> cells. Kruskal-Wallis nonparametric one-way ANOVA with Dunn's multiple comparisons test was done between groups, with p-values shown above data. A one sample nonparametric Wilcoxon signed-rank test with Pratt method was done to compare individual values, with p-values shown below data. Wilcoxon signed-rank test with method of Pratt, where above 0 indicates higher expression in migrating cells and below 0 indicates higher expression in non-migrating cells. Median and p ≤ 0.1 are shown. T<sup>CM</sup>, central memory T cell; T<sup>EM</sup>, effector memory T cell; RRMS, relapsing-remitting multiple sclerosis.

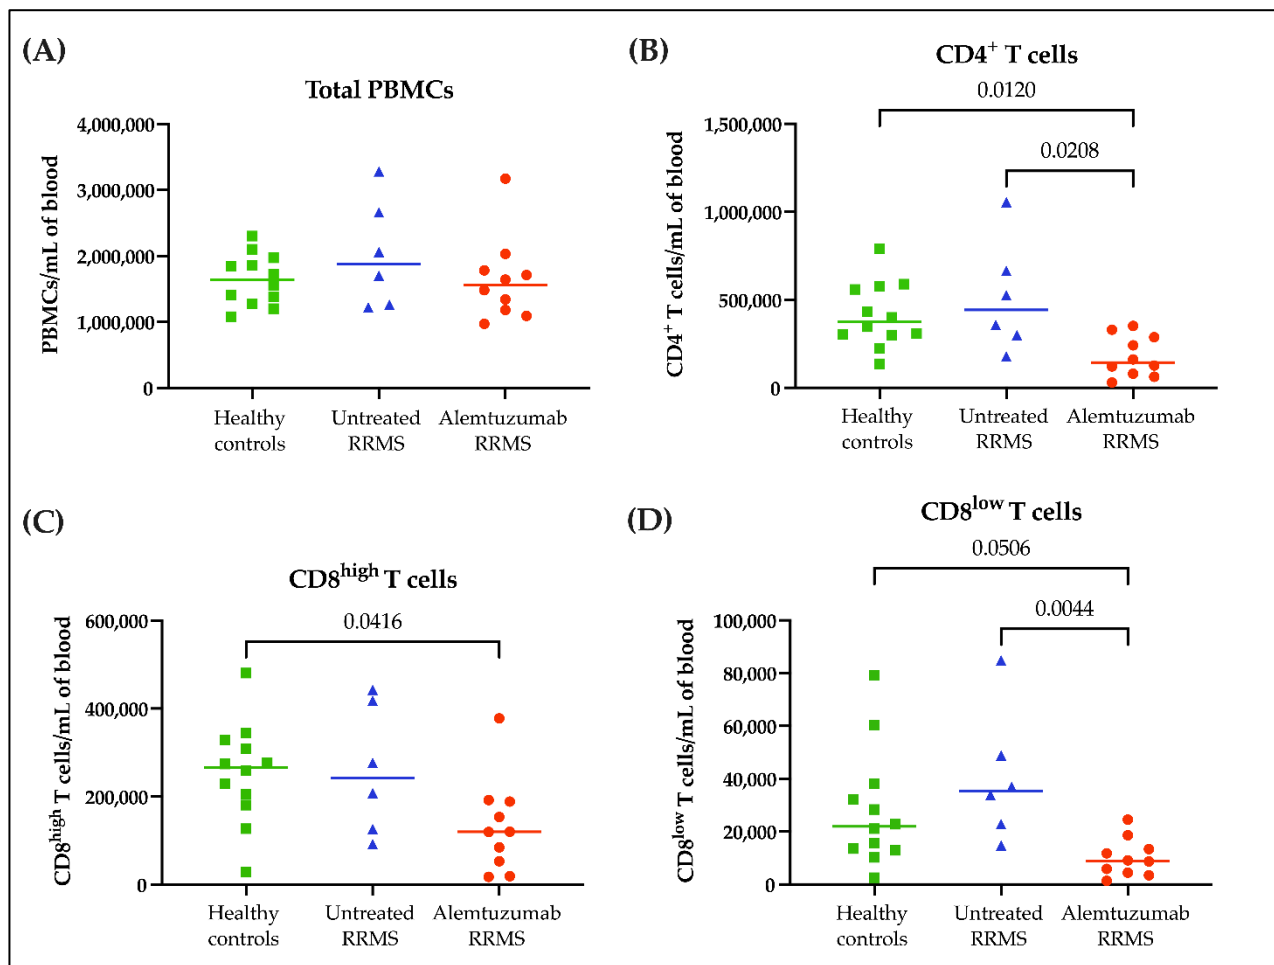

**Figure S6. Fresh cell counts of total PBMCs and major lymphocyte populations.** Blood was sampled from healthy controls ( $n = 12$ , green squares), untreated RRMS ( $n = 6$ , blue triangles) and alemtuzumab-treated RRMS patients ( $n = 10$ , red circles). Upon sample collection, fresh PBMCs were immediately isolated and phenotyped. **(A)** The total number of PBMCs per mL of blood. **(B)** The total number of CD4<sup>+</sup> T cells per mL of blood. **(C)** The total number of CD8<sup>high</sup> T cells per mL of blood. **(D)** The total number of CD8<sup>low</sup> T cells per mL of blood. Kruskal-Wallis nonparametric one-way ANOVA with Dunn's multiple comparisons test. Median and  $p \leq 0.1$  are shown. PBMC, peripheral blood mononuclear cells; RRMS, relapsing-remitting multiple sclerosis.

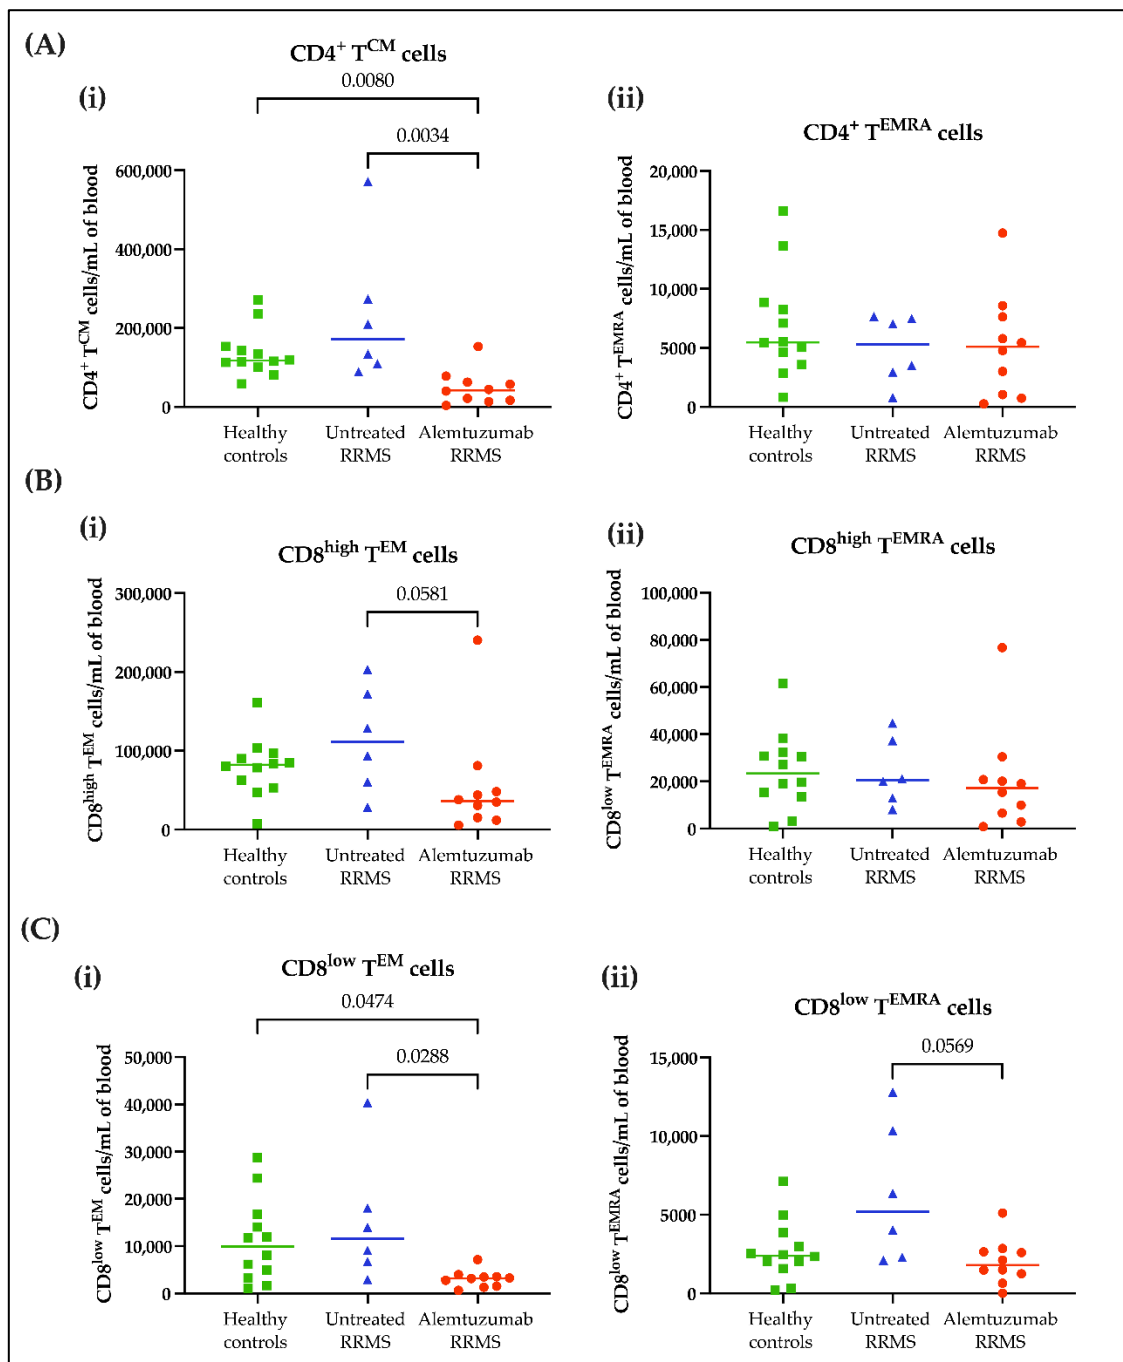

**Figure S7. Fresh cell counts of  $CD4^+$  and  $CD8^+$  T cell subsets.** Blood was sampled from healthy controls ( $n = 12$ , green squares), untreated RRMS ( $n = 6$ , blue triangles) and alemtuzumab-treated RRMS patients ( $n = 10$ , red circles). Upon sample collection, fresh PBMCs were immediately isolated and phenotyped. **(A)** The total number of **(i)**  $CD4^+ T^{CM}$  cells and **(ii)**  $CD4^+ T^{EMRA}$  cells per mL of blood. **(B)** The total number of **(i)**  $CD8^{high} T^{EM}$  cells and **(ii)**  $CD8^{high} T^{EMRA}$  cells per mL of blood. **(C)** The total number of **(i)**  $CD8^{low} T^{EM}$  cells and **(ii)**  $CD8^{low} T^{EMRA}$  cells per mL of blood. Kruskal-Wallis nonparametric one-way ANOVA with Dunn's multiple comparisons test. Median and  $p \leq 0.1$  are shown. PBMC, peripheral blood mononuclear cells; RRMS, relapsing-remitting multiple sclerosis;  $T^{CM}$ , central memory T cell;  $T^{EM}$ , effector memory T cell;  $T^{EMRA}$ , terminally differentiated effector memory T cells re-expressing CD45RA ( $CD45RA^+CD197^-$ ).
